# Supplementary material
Source: PubMed Central journal article supplement (PMC2856935)

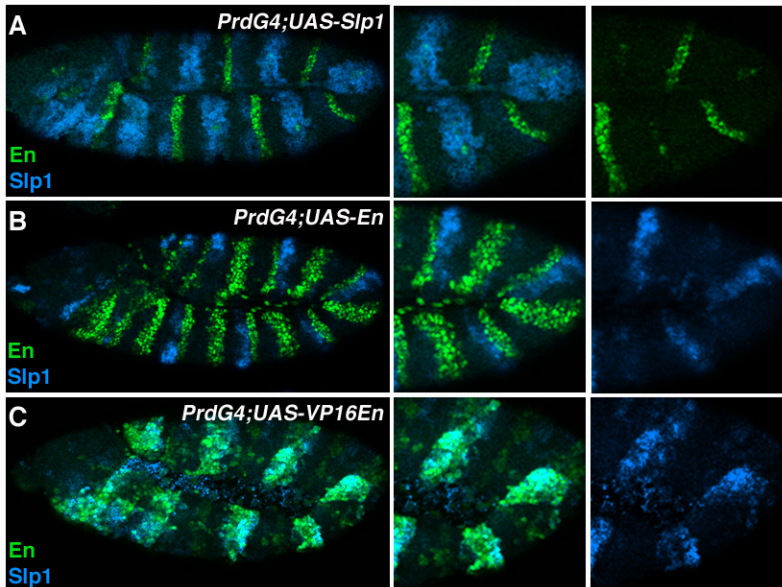

**Suppl Fig1: Gebelein and Mann**

Supplement: NIHMS29112-supplement-01.pdf [file NIHMS29112-supplement-01.pdf]
